# Supplementary material
Source: PubMed Central journal article supplement (PMC2141895)
Supplement: pnas_0707428104_3.pdf [file pnas_0707428104_3.pdf]

**Table 7. Mean numbers of hydrogen bonds formed by the MgADP at binding site 2 with individual SUR1 residues in the four different simulations**

|       | wt ADP+ Pi | R1380L ADP+ Pi | wt ADP no Pi | R1380L no Pi |
|-------|------------|----------------|--------------|--------------|
| H816  | 0.21       | 0.10           |              |              |
| Q819  |            | 0.16           |              |              |
| E824  |            | 0.21           | 0.05         |              |
| N828  |            | 0.10           | 0.47         | 0.60         |
| L829  |            | 0.16           |              |              |
| S830  |            | 0.31           | 1.02         | 0.92         |
| G831  | 0.55       | 0.76           | 0.05         | 0.04         |
| G832  | 0.65       | 0.03           |              |              |
| Q833  |            |                | 1.06         | 2.14         |
| R834  | 0.47       | 0.49           |              |              |
| S1357 | 0.23       |                |              |              |
| T1381 | 0.88       | 1.00           |              |              |
| G1382 | 1.35       | 0.45           |              |              |
| S1383 | 0.57       |                |              | 0.24         |
| G1384 | 0.18       | 0.91           |              |              |
| K1385 | 0.33       | 0.09           | 0.81         | 0.89         |
| S1386 | 0.74       |                | 0.86         | 0.90         |
| S1387 |            |                | 1.11         | 1.00         |
| H1538 |            |                | 0.05         | 0.35         |
| TOTAL | 6.16       | 4.77           | 5.48         | 7.08         |
