# Supplementary material
Source: PubMed Central journal article supplement (PMC2141895)
Supplement: pnas_0707428104_4.pdf [file pnas_0707428104_4.pdf]

**Table 8. Mean numbers of hydrogen bonds formed by the post-hydrolytic phosphate at binding site 2 with individual SUR1 residues in the wild-type and mutant simulations**

|       | wt ADP+ Pi | R1380L ADP+ Pi |
|-------|------------|----------------|
| G832  | 0.13       |                |
| R834  |            | 0.02           |
| Q835  | 0.12       |                |
| D860  | 0.20       |                |
| T1381 | 0.04       |                |
| K1385 | 0.68       | 0.02           |
| Q1427 |            | 0.19           |
| TOTAL | 1.17       | 0.23           |
