# Supplementary material
Source: PubMed Central journal article supplement (PMC2141895)

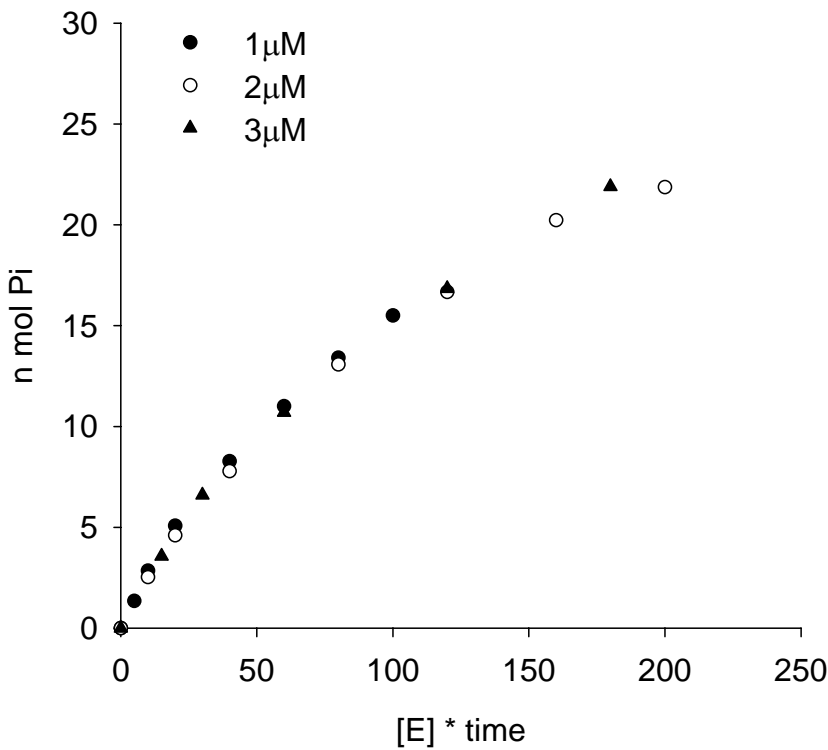

Supplement: pnas_0707428104_1.pdf [file pnas_0707428104_1.pdf]

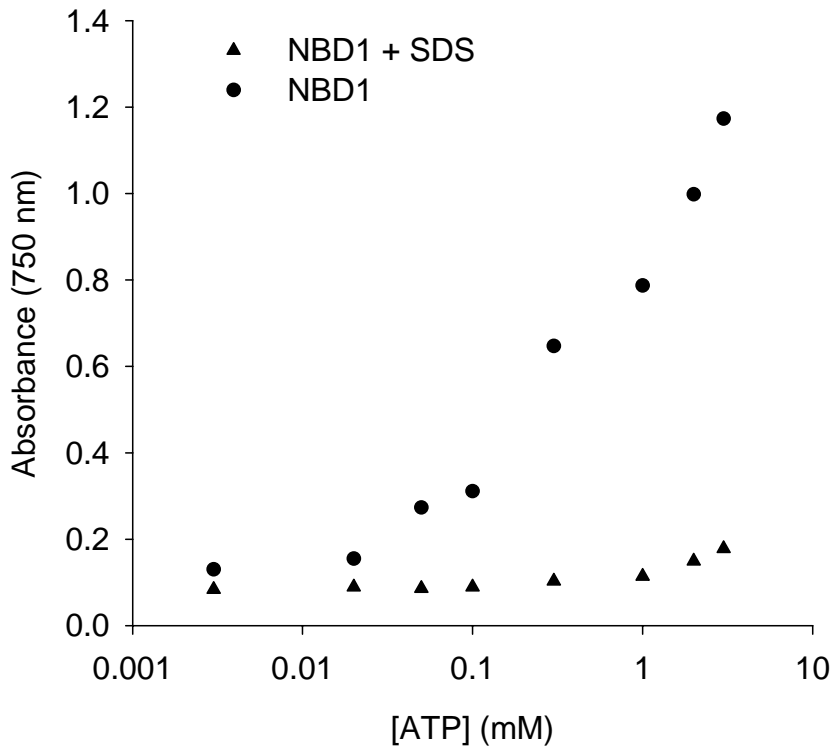

Supplement: pnas_0707428104_2.pdf [file pnas_0707428104_2.pdf]
